# Supplementary material for: Association between excessive chronic iodine exposure and the occurrence of papillary thyroid carcinoma
Source: PubMed Central journal article supplement — Oncol Lett. 2020 Sep 3;20(5):189. doi: 10.3892/ol.2020.12051 (PMC7479532; doi:10.3892/ol.2020.12051), 2020-09-03

Figure S1. Pre- and postoperative distribution of urinary iodine concentration. Blue indicates preoperative and orange indicates post-operative values.

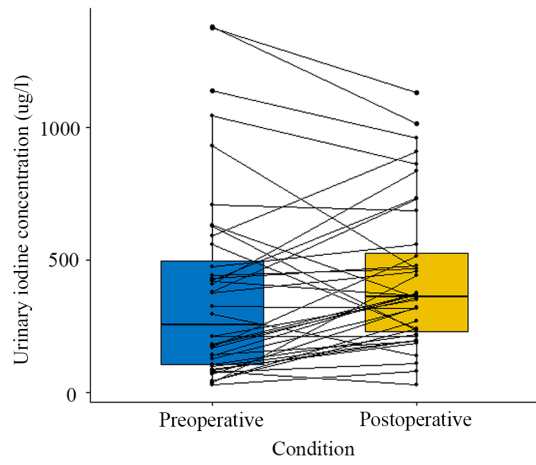

Supplement: Supplementary_Data.pdf [file Supplementary_Data.pdf]
